# Supplementary material for: Rapidly adaptable automated interpretation of point-of-care COVID-19 diagnostics
Source: PubMed Central journal article supplement (PMC10290128; doi:10.1038/s43856-023-00312-x), 2023-06-23
Supplement: 43856_2023_312_MOESM6_ESM.pdf [file 43856_2023_312_MOESM6_ESM.pdf]

## **Description of Additional Supplementary File**

**File Name:** Supplementary Data 1

**Description:** Source data for Figure 4

**File Name:** Supplementary Data 2

**Description:** Source data for Figure 7C

**File Name:** Supplementary Video 1

**Description:** Overview of sample dashboard for real-time population disease surveillance and visualization of data generated by the algorithm of this study as collected from smartphones
